# Supplementary material for: B chromosome in the beetle Coprophanaeus cyanescens (Scarabaeidae): emphasis in the organization of repetitive DNA sequences
Source: PubMed Central journal article supplement (PMC3506448; doi:10.1186/1471-2156-13-96), 2012-11-06
Supplement: 1471-2156-13-96-S1.pdf [file 1471-2156-13-96-S1.pdf]

**Additional file 1:** Alignment of the *LOA* non-LTR retrotransposon nucleotide sequences from *Nasonia vitripennis* (Baggins-1\_NVi) and *Coprophanæus cyanescens* (Cc-1 to Cc-3). The asterisks (\*) indicate similarity in sequence, and the dashes (-) indicate indels.

```

Baggins-1_NVi  TGCTGCAGCAGGGCATGGACGTATTAGTCCCAGCCTTGGAGAAATTGTACCGAGCCTGTC
Cc-1          TGCTACAATAGGGCATTGATCTATCATCTCCACTTCTCTGCATTATATACATGGCCAGTT
Cc-2          TGCTACAATAGGGCATTGATCTATCATCTCCACTTCTCTGCATTATATACATGGCCAGTT
Cc-3          TGCTACAATAGGGCATTGATCTATCATCTCCACTTCTCTGCATTATATACATGGCCAGTT
              ****  **  *****  **  ***  *   ***   *   *   *  ***   ***  **

Baggins-1_NVi  TGGC ACTAGGATATGTGCCGGAAGAATGGGGGCAGGCGAGGGTGGCTTTTCCTGCCCAAAC
Cc-1          TGGCATTGGTATATATGTCTGAAAAGTGGATGGAAACTACGGTGGTTTTTATATCCAAAC
Cc-2          TGGCATTGGTATATATGTCTGAAGAGTGGATGGAAACTACGGTGGTTTTTATATCCAAAC
Cc-3          TGGCATTGGTATATATGTCTGAAAAGTGGATGGAAACTACGGTGGTTTTTATATCCAAAC
              *****  *  *  *****  **  *  ***  *  ***  *  *  *  *  *****  ***  *  *****

Baggins-1_NVi  CAGGTAAGAC-----ACAACACGC GGTTCGCAAAGGACTTCAGGCCAATCAGCATGACCTC
Cc-1          TGGGCCCTACTTCTTACAACCTGGC-----CAAAGCATTCTGGCTAATCAGTCTGACGTC
Cc-2          TGGGCCCTACTTCTTACAACCTGGC-----CAAAGCATTCTGGCTAATCAGTCTGACGTC
Cc-3          TGGGCCCTGCTTCTTACAACCTGGC-----CAAAGCATTCTGGCTAATCAGTCTGACGTC
              **      *      *****  **      ****  *   ***  ***  *****  ****  **

Baggins-1_NVi  GTTTTTACTCAAACCCCTGGAAAGGCTGGTTGACAGATATATCG AGGA
Cc-1          TTTTCCTGCTAAAAGCCATGAAAAGGTTGATTGAGCGACGTATTAGGGA
Cc-2          TTTTCCTGCTAAAAGCCATGAAAAGGTTGATTGAGCGACGTATTAGGGA
Cc-3          TTTTCCTGCTAAAAGCCATGAAAAGGTTGATTGAGCGACGTATTAGGGA
              **   *  **  ***  **  **  *****  **  *****  **   ***   ***

```
